# Supplementary material
Source: MDPI journal article supplement (https://www.mdpi.com/2077-0472/11/10/974)
Supplement: s1 [file s1 › agriculture-1385349-supplementary.pdf]

**Figure S1.** Questionnaire for Japanese restaurant and Japanese food store

Date: .....

Restaurant/Store Name: .....

| No. | QUESTION                            | ANSWER |
|-----|-------------------------------------|--------|
| 1   | Number of seats/Scale of the store  |        |
| 2   | Contact Person                      |        |
|     | Name                                |        |
|     | Phone number                        |        |
| 3   | Currently purchasing japonica rice  |        |
|     | Purchase from                       |        |
|     | Purchase volume                     |        |
|     | Purchase price                      |        |
| 4   | Preference for Kenyan japonica rice |        |
|     | Purchase volume                     |        |
|     | Purchase price                      |        |
|     | Payment conditions                  |        |

**Figure S2.** Questionnaire for customers at shopping mall

**1. Rice and Japanese food**

(1/5)

| No.                 | Item        | Answer options                                                          |
|---------------------|-------------|-------------------------------------------------------------------------|
| General Information |             |                                                                         |
| Q.1                 | Gender      | What is your gender?                                                    |
|                     |             | <input type="checkbox"/> Female                                         |
|                     |             | <input type="checkbox"/> Male                                           |
| Q.2                 | Age         | What is your age range?                                                 |
|                     |             | <input type="checkbox"/> Under 20                                       |
|                     |             | <input type="checkbox"/> 20 -29                                         |
|                     |             | <input type="checkbox"/> 30-39                                          |
|                     |             | <input type="checkbox"/> 40-49                                          |
|                     |             | <input type="checkbox"/> Over 50                                        |
| Q.3                 | Ethnicity   | What is your ethnicity?                                                 |
|                     |             | <input type="checkbox"/> Kenyan                                         |
|                     |             | <input type="checkbox"/> Other African                                  |
|                     |             | <input type="checkbox"/> Indian                                         |
|                     |             | <input type="checkbox"/> Asian (non-Indian)                             |
|                     |             | <input type="checkbox"/> European                                       |
|                     |             | <input type="checkbox"/> Arab                                           |
| Q.4                 | Staple food | What is the staple food you have regularly for meal? (multiple answers) |
|                     |             | <input type="checkbox"/> Ugari                                          |
|                     |             | <input type="checkbox"/> Chapati                                        |
|                     |             | <input type="checkbox"/> Githeri                                        |
|                     |             | <input type="checkbox"/> Irio                                           |
|                     |             | <input type="checkbox"/> Rice                                           |
|                     |             | <input type="checkbox"/> Other (Please specify, if other.)              |
|                     |             | ( )                                                                     |

| No.  | Item       | Answer options                                                                                                                                                                                                                                                                                                                                                                                                                                     |
|------|------------|----------------------------------------------------------------------------------------------------------------------------------------------------------------------------------------------------------------------------------------------------------------------------------------------------------------------------------------------------------------------------------------------------------------------------------------------------|
| Rice |            |                                                                                                                                                                                                                                                                                                                                                                                                                                                    |
| Q.5  | Frequently | <p>Do you eat rice? If so, how often?</p> <p> <input type="checkbox"/> Every day<br/> <input type="checkbox"/> 4-6 times a week<br/> <input type="checkbox"/> 2-3 times a week<br/> <input type="checkbox"/> Once a week<br/> <input type="checkbox"/> Occasionally, less than once a week<br/> <input type="checkbox"/> Never </p>                                                                                                                |
|      |            |                                                                                                                                                                                                                                                                                                                                                                                                                                                    |
| Q.6  | Cook rice  | <p>Do you, or your family, cook rice at home? If so, how is the rice cooked? (multiple answers)</p> <p> <input type="checkbox"/> Simply steamed<br/> <input type="checkbox"/> Oil is added<br/> <input type="checkbox"/> Salt is added<br/> <input type="checkbox"/> Never<br/> <input type="checkbox"/> Other (Please specify, if other.) </p> <p>( )</p>                                                                                         |
|      |            |                                                                                                                                                                                                                                                                                                                                                                                                                                                    |
| Q.7  | Purchase   | <p>Do you, or your family, purchase rice? If so, what variety of rice do you purchase? (Choose any that apply)</p> <p> <input type="checkbox"/> Basmati (Pishori)<br/> <input type="checkbox"/> IR<br/> <input type="checkbox"/> Pakistan rice<br/> <input type="checkbox"/> Japonica rice<br/> <input type="checkbox"/> I do not know what variety of rice I eat.<br/> <input type="checkbox"/> Other (Please specify, if other.) </p> <p>( )</p> |

| No.  | Item     | Answer options                                                                                                                                                                                                                                                                                                                                                                                                             |
|------|----------|----------------------------------------------------------------------------------------------------------------------------------------------------------------------------------------------------------------------------------------------------------------------------------------------------------------------------------------------------------------------------------------------------------------------------|
| Rice |          |                                                                                                                                                                                                                                                                                                                                                                                                                            |
| Q.8  | Purchase | <p>What is it that you take importance when purchasing rice?</p> <p> <input type="checkbox"/> Aroma<br/> <input type="checkbox"/> Brand<br/> <input type="checkbox"/> Design of package<br/> <input type="checkbox"/> Reputation<br/> <input type="checkbox"/> Price<br/> <input type="checkbox"/> I choose my rice depending on the dish.<br/> <input type="checkbox"/> Other (Please specify, if other.) </p> <p>( )</p> |
|      |          |                                                                                                                                                                                                                                                                                                                                                                                                                            |
| Q.9  | Purchase | <p>Do you know where the rice you purchase come from?</p> <p> <input type="checkbox"/> Locally produced<br/> <input type="checkbox"/> Uganda<br/> <input type="checkbox"/> Korea<br/> <input type="checkbox"/> I don't pay attention to where my rice come from.<br/> <input type="checkbox"/> Other (Please specify, if other.) </p> <p>( )</p>                                                                           |
|      |          |                                                                                                                                                                                                                                                                                                                                                                                                                            |
| Q.10 | Purchase | <p>Where do you go to, to purchase rice?</p> <p> <input type="checkbox"/> Supermarkets<br/> <input type="checkbox"/> Local markets<br/> <input type="checkbox"/> Other (Please specify, if other.) </p> <p>( )</p>                                                                                                                                                                                                         |

| No.           | Item          | Answer options                                                                                                                                                                                                                                                                                                                                                                                                                                                              |
|---------------|---------------|-----------------------------------------------------------------------------------------------------------------------------------------------------------------------------------------------------------------------------------------------------------------------------------------------------------------------------------------------------------------------------------------------------------------------------------------------------------------------------|
| Japanese food |               |                                                                                                                                                                                                                                                                                                                                                                                                                                                                             |
| Q.11          | Frequently    | Do you eat Japanese food?<br><input type="checkbox"/> Yes, regularly<br><input type="checkbox"/> Yes, occasionally<br><input type="checkbox"/> Never                                                                                                                                                                                                                                                                                                                        |
|               |               |                                                                                                                                                                                                                                                                                                                                                                                                                                                                             |
| Q.12          | Restaurant    | Do you visit Japanese restaurants in Nairobi?<br><input type="checkbox"/> Yes, regularly<br><input type="checkbox"/> Yes, occasionally<br><input type="checkbox"/> Never                                                                                                                                                                                                                                                                                                    |
|               |               |                                                                                                                                                                                                                                                                                                                                                                                                                                                                             |
| Q.13          | Japanese dish | Which Japanese dish is your favorite? Please check any that apply.<br><input type="checkbox"/> Sushi<br><input type="checkbox"/> Tempura<br><input type="checkbox"/> Sashimi<br><input type="checkbox"/> Sukiyaki<br><input type="checkbox"/> Ramen<br><input type="checkbox"/> Miso-soup<br><input type="checkbox"/> Tofu<br><input type="checkbox"/> Teriyaki<br><input type="checkbox"/> Other (Please specify, if other.)<br><div style="text-align: center;">( )</div> |
|               |               |                                                                                                                                                                                                                                                                                                                                                                                                                                                                             |
| Q.14          | Good point    | Which is it that your like about Japanese food?<br><input type="checkbox"/> The taste<br><input type="checkbox"/> Presentation<br><input type="checkbox"/> Healthiness<br><input type="checkbox"/> I don't like Japanese food very much<br><input type="checkbox"/> Other (Please specify, if other.)<br><div style="text-align: center;">( )</div>                                                                                                                         |

## 2. Evaluation of post-tasting Kenyan japonica rice

(5/5)

| No.  | Item       | Answer options                                                                                                                                                                                                                                                                                                                                                                                                                                                                                                                                                                                                                           |
|------|------------|------------------------------------------------------------------------------------------------------------------------------------------------------------------------------------------------------------------------------------------------------------------------------------------------------------------------------------------------------------------------------------------------------------------------------------------------------------------------------------------------------------------------------------------------------------------------------------------------------------------------------------------|
| Q.15 | Evaluation | <p>The variety of this rice is called "Kenyan Japonica rice". How did you like it?</p> <p> <input type="checkbox"/> Yes, very good<br/> <input type="checkbox"/> Yes, good<br/> <input type="checkbox"/> It is acceptable<br/> <input type="checkbox"/> Dislike </p>                                                                                                                                                                                                                                                                                                                                                                     |
| Q.16 | Experience | <p>Have you ever had Japonica rice before?</p> <p> <input type="checkbox"/> Yes, I eat Japonica rice regularly<br/> <input type="checkbox"/> Yes, I have tasted it on occasions<br/> <input type="checkbox"/> No, this was my first time </p>                                                                                                                                                                                                                                                                                                                                                                                            |
| Q.17 | Good point | <p>What would you consider favorable among the characteristics of Japonica rice?</p> <p> <input type="checkbox"/> Texture<br/> <input type="checkbox"/> Taste<br/> <input type="checkbox"/> Aroma<br/> <input type="checkbox"/> Other (Please specify, if other.) </p> <div style="border-left: 1px solid black; border-right: 1px solid black; height: 20px; margin-top: 5px;"></div>                                                                                                                                                                                                                                                   |
| Q.18 | Purchase   | <p>If you were to purchase Japonica rice, what is the maximum price you would pay for? (Unit options is price per kg.)</p> <p> <input type="checkbox"/> 160KSh<br/> <input type="checkbox"/> 180KSh<br/> <input type="checkbox"/> 200KSh<br/> <input type="checkbox"/> 250KSh<br/> <input type="checkbox"/> 300KSh<br/> <input type="checkbox"/> Other (Please specify, if other.) </p> <div style="border-left: 1px solid black; border-right: 1px solid black; height: 20px; margin-top: 5px;"></div>                                                                                                                                  |
| Q.19 | Purchase   | <p>Is there additional information you would like to receive, considering purchase of Japonica rice? Please check any that apply.</p> <p> <input type="checkbox"/> Cooking instructions<br/> <input type="checkbox"/> Specific cookware<br/> <input type="checkbox"/> Place of production<br/> <input type="checkbox"/> Brand<br/> <input type="checkbox"/> Nutritional value<br/> <input type="checkbox"/> Cooking instructions of Japanese dishes<br/> <input type="checkbox"/> Other (Please specify, if other.) </p> <div style="border-left: 1px solid black; border-right: 1px solid black; height: 20px; margin-top: 5px;"></div> |
